# Supplementary material
Source: publisher figshare collection journal article supplement (https://acs.figshare.com/ndownloader/files/5132005)
Supplement: Supplementary file 1 [file 5132005]

  
data_ang72 
  
_vrf_PLAT306_ang72 
; 
PROBLEM: Isolated Oxygen Atom (H-atoms Missing ?) .......        O1 
RESPONSE: H-atoms of water solvent were not assigned 
; 
_vrf_PLAT430_ang72 
; 
PROBLEM: Short Inter D...A Contact  O2     ..  O5      ..       2.45 Ang. 
RESPONSE: H-atoms of water solvent were not assigned. Positions of water 
solvent are disordered 
; 
  
  
  
_audit_creation_method            SHELXL-97 
_chemical_name_systematic 
; 
 ? 
; 
_chemical_name_common             ? 
_chemical_melting_point           ? 
_chemical_formula_moiety          ? 
_chemical_formula_sum 
 'C21 H36 B2 F8 O4.50 P2 Pd2' 
_chemical_formula_weight          808.86 
  
loop_ 
 _atom_type_symbol 
 _atom_type_description 
 _atom_type_scat_dispersion_real 
 _atom_type_scat_dispersion_imag 
 _atom_type_scat_source 
 'C'  'C'   0.0033   0.0016 
 'International Tables Vol C Tables 4.2.6.8 and 6.1.1.4' 
 'H'  'H'   0.0000   0.0000 
 'International Tables Vol C Tables 4.2.6.8 and 6.1.1.4' 
 'B'  'B'   0.0013   0.0007 
 'International Tables Vol C Tables 4.2.6.8 and 6.1.1.4' 
 'F'  'F'   0.0171   0.0103 
 'International Tables Vol C Tables 4.2.6.8 and 6.1.1.4' 
 'P'  'P'   0.1023   0.0942 
 'International Tables Vol C Tables 4.2.6.8 and 6.1.1.4' 
 'Pd'  'Pd'  -0.9988   1.0072 
 'International Tables Vol C Tables 4.2.6.8 and 6.1.1.4' 
 'O'  'O'   0.0106   0.0060 
 'International Tables Vol C Tables 4.2.6.8 and 6.1.1.4' 
  
_symmetry_cell_setting            Monoclinic 
_symmetry_space_group_name_H-M    C2/c 
  
loop_ 
 _symmetry_equiv_pos_as_xyz 
 'x, y, z' 
 '-x, y, -z+1/2' 
 'x+1/2, y+1/2, z' 
 '-x+1/2, y+1/2, -z+1/2' 
 '-x, -y, -z' 
 'x, -y, z-1/2' 
 '-x+1/2, -y+1/2, -z' 
 'x+1/2, -y+1/2, z-1/2' 
  
_cell_length_a                    21.919(5) 
_cell_length_b                    19.441(4) 
_cell_length_c                    16.339(4) 
_cell_angle_alpha                 90.00 
_cell_angle_beta                  104.285(4) 
_cell_angle_gamma                 90.00 
_cell_volume                      6747(3) 
_cell_formula_units_Z             8 
_cell_measurement_temperature     180(2) 
_cell_measurement_reflns_used     938 
_cell_measurement_theta_min       2.46 
_cell_measurement_theta_max       26.09 
  
_exptl_crystal_description        late 
_exptl_crystal_colour             pink 
_exptl_crystal_size_max           0.30 
_exptl_crystal_size_mid           0.15 
_exptl_crystal_size_min           0.08 
_exptl_crystal_density_meas       none 
_exptl_crystal_density_diffrn     1.592 
_exptl_crystal_density_method     'not measured' 
_exptl_crystal_F_000              3216 
_exptl_absorpt_coefficient_mu     1.230 
_exptl_absorpt_correction_type    multi-scan 
_exptl_absorpt_correction_T_min   0.72 
_exptl_absorpt_correction_T_max   1 
_exptl_absorpt_process_details    'Bruker SADABS' 
  
_exptl_special_details 
; 
 ? 
; 
  
_diffrn_ambient_temperature       180(2) 
_diffrn_radiation_wavelength      0.71073 
_diffrn_radiation_type            MoK\a 
_diffrn_radiation_source          'fine-focus sealed tube' 
_diffrn_radiation_monochromator   graphite 
_diffrn_measurement_device_type   'CCD area detector' 
_diffrn_measurement_method        'phi and omega scans' 
_diffrn_detector_area_resol_mean  ? 
_diffrn_standards_number          ? 
_diffrn_standards_interval_count  ? 
_diffrn_standards_interval_time   ? 
_diffrn_standards_decay_%         ? 
_diffrn_reflns_number             27365 
_diffrn_reflns_av_R_equivalents   0.0459 
_diffrn_reflns_av_sigmaI/netI     0.0465 
_diffrn_reflns_limit_h_min        -26 
_diffrn_reflns_limit_h_max        27 
_diffrn_reflns_limit_k_min        -24 
_diffrn_reflns_limit_k_max        24 
_diffrn_reflns_limit_l_min        -20 
_diffrn_reflns_limit_l_max        20 
_diffrn_reflns_theta_min          2.46 
_diffrn_reflns_theta_max          26.37 
_reflns_number_total              6889 
_reflns_number_gt                 4964 
_reflns_threshold_expression      >2sigma(I) 
  
_computing_data_collection        'Bruker SMART' 
_computing_cell_refinement        'Bruker SMART' 
_computing_data_reduction         'Bruker SAINT' 
_computing_structure_solution     'SHELXS-97 (Sheldrick, 1990)' 
_computing_structure_refinement   'SHELXL-97 (Sheldrick, 1997)' 
_computing_molecular_graphics     'Bruker SHELXTL' 
_computing_publication_material   'Bruker SHELXTL' 
  
_refine_special_details 
; 
 Refinement of F^2^ against ALL reflections.  The weighted R-factor wR and 
 goodness of fit S are based on F^2^, conventional R-factors R are based 
 on F, with F set to zero for negative F^2^. The threshold expression of 
 F^2^ > 2sigma(F^2^) is used only for calculating R-factors(gt) etc. and is 
 not relevant to the choice of reflections for refinement.  R-factors based 
 on F^2^ are statistically about twice as large as those based on F, and R- 
 factors based on ALL data will be even larger. 
; 
  
_refine_ls_structure_factor_coef  Fsqd 
_refine_ls_matrix_type            full 
_refine_ls_weighting_scheme       calc 
_refine_ls_weighting_details 
 'calc w=1/[\s^2^(Fo^2^)+(0.1098P)^2^+49.5862P] where P=(Fo^2^+2Fc^2^)/3' 
_atom_sites_solution_primary      direct 
_atom_sites_solution_secondary    difmap 
_atom_sites_solution_hydrogens    geom 
_refine_ls_hydrogen_treatment     mixed 
_refine_ls_extinction_method      none 
_refine_ls_extinction_coef        ? 
_refine_ls_number_reflns          6889 
_refine_ls_number_parameters      402 
_refine_ls_number_restraints      1 
_refine_ls_R_factor_all           0.0915 
_refine_ls_R_factor_gt            0.0636 
_refine_ls_wR_factor_ref          0.1940 
_refine_ls_wR_factor_gt           0.1705 
_refine_ls_goodness_of_fit_ref    1.052 
_refine_ls_restrained_S_all       1.052 
_refine_ls_shift/su_max           0.000 
_refine_ls_shift/su_mean          0.000 
  
loop_ 
 _atom_site_label 
 _atom_site_type_symbol 
 _atom_site_fract_x 
 _atom_site_fract_y 
 _atom_site_fract_z 
 _atom_site_U_iso_or_equiv 
 _atom_site_adp_type 
 _atom_site_occupancy 
 _atom_site_symmetry_multiplicity 
 _atom_site_calc_flag 
 _atom_site_refinement_flags 
 _atom_site_disorder_assembly 
 _atom_site_disorder_group 
Pd1 Pd 0.25426(2) 0.07228(3) 0.28093(3) 0.03437(18) Uani 1 1 d . . . 
Pd2 Pd 0.02369(2) 0.20880(3) 0.05749(4) 0.03869(19) Uani 1 1 d . . . 
B1 B 0.3240(5) 0.8767(6) 0.1241(7) 0.060(3) Uani 1 1 d . . . 
B2 B 1.0000 0.9873(7) 0.2500 0.049(3) Uani 1 2 d S . . 
B3 B 0.2500 0.2500 1.0000 0.059(4) Uani 1 2 d S . . 
C1 C 0.3457(5) 0.1340(6) 0.2918(10) 0.088(4) Uani 1 1 d . . . 
H1 H 0.3810 0.1227 0.2673 0.106 Uiso 1 1 calc R . . 
C2 C 0.3385(7) 0.1164(6) 0.3712(9) 0.091(4) Uani 1 1 d . . . 
H2 H 0.3690 0.0894 0.4128 0.110 Uiso 1 1 calc R . . 
C3 C 0.2882(7) 0.1499(7) 0.3877(7) 0.084(4) Uani 1 1 d . . . 
H3 H 0.2765 0.1503 0.4419 0.101 Uiso 1 1 calc R . . 
C4 C 0.2618(5) 0.1883(5) 0.3198(7) 0.065(3) Uani 1 1 d . . . 
H4 H 0.2262 0.2197 0.3154 0.078 Uiso 1 1 calc R . . 
C5 C 0.2933(6) 0.1763(5) 0.2570(7) 0.076(3) Uani 1 1 d . . . 
H5 H 0.2853 0.1999 0.2024 0.091 Uiso 1 1 calc R . . 
C6 C 0.1936(5) -0.0201(5) 0.4201(6) 0.061(2) Uani 1 1 d . . . 
H6A H 0.1512 -0.0114 0.3885 0.092 Uiso 1 1 calc R . . 
H6B H 0.2079 0.0172 0.4586 0.092 Uiso 1 1 calc R . . 
H6C H 0.1949 -0.0622 0.4513 0.092 Uiso 1 1 calc R . . 
C7 C 0.3180(5) -0.0572(5) 0.4154(9) 0.087(4) Uani 1 1 d . . . 
H7A H 0.3136 -0.1039 0.4321 0.130 Uiso 1 1 calc R . . 
H7B H 0.3295 -0.0286 0.4647 0.130 Uiso 1 1 calc R . . 
H7C H 0.3503 -0.0548 0.3849 0.130 Uiso 1 1 calc R . . 
C8 C 0.2119(6) -0.0994(4) 0.2829(6) 0.065(3) Uani 1 1 d . . . 
H8A H 0.2127 -0.1394 0.3175 0.097 Uiso 1 1 calc R . . 
H8B H 0.2366 -0.1077 0.2428 0.097 Uiso 1 1 calc R . . 
H8C H 0.1693 -0.0893 0.2534 0.097 Uiso 1 1 calc R . . 
C9 C 0.2170(4) 0.0382(4) 0.1522(5) 0.0488(19) Uani 1 1 d . . . 
C10 C 0.1672(3) 0.0567(4) 0.1834(5) 0.0402(17) Uani 1 1 d . . . 
C11 C 0.1324(3) 0.1237(4) 0.1632(5) 0.0413(17) Uani 1 1 d . . . 
H11A H 0.1596 0.1580 0.1477 0.050 Uiso 1 1 calc R . . 
H11B H 0.1194 0.1401 0.2124 0.050 Uiso 1 1 calc R . . 
C12 C 0.0747(3) 0.1120(3) 0.0901(5) 0.0386(16) Uani 1 1 d . . . 
C13 C 0.0784(2) 0.1312(3) 0.0071(5) 0.0458(18) Uani 1 1 d D . . 
C14 C 0.0962(5) 0.2926(5) 0.1087(9) 0.078(3) Uani 1 1 d . . . 
H14 H 0.1414 0.2841 0.1302 0.093 Uiso 1 1 calc R . . 
C15 C 0.0547(8) 0.2951(6) 0.1576(9) 0.097(4) Uani 1 1 d . . . 
H15 H 0.0644 0.2898 0.2191 0.116 Uiso 1 1 calc R . . 
C16 C -0.0031(7) 0.3094(5) 0.1048(12) 0.096(5) Uani 1 1 d . . . 
H16 H -0.0419 0.3184 0.1227 0.115 Uiso 1 1 calc R . . 
C17 C 0.0054(6) 0.3213(5) 0.0236(10) 0.086(4) Uani 1 1 d . . . 
H17 H -0.0263 0.3393 -0.0249 0.103 Uiso 1 1 calc R . . 
C18 C 0.0684(6) 0.3115(5) 0.0273(8) 0.074(3) Uani 1 1 d . . . 
H18 H 0.0895 0.3195 -0.0181 0.089 Uiso 1 1 calc R . . 
C19 C -0.1034(6) 0.1497(6) 0.1166(9) 0.093(4) Uani 1 1 d . . . 
H19A H -0.1446 0.1295 0.1005 0.139 Uiso 1 1 calc R . . 
H19B H -0.1060 0.1941 0.1413 0.139 Uiso 1 1 calc R . . 
H19C H -0.0761 0.1205 0.1571 0.139 Uiso 1 1 calc R . . 
C20 C -0.1303(6) 0.2099(8) -0.0474(13) 0.151(9) Uani 1 1 d . . . 
H20A H -0.1213 0.2106 -0.1020 0.226 Uiso 1 1 calc R . . 
H20B H -0.1296 0.2560 -0.0262 0.226 Uiso 1 1 calc R . . 
H20C H -0.1713 0.1903 -0.0523 0.226 Uiso 1 1 calc R . . 
C21 C -0.0767(4) 0.0739(5) -0.0187(7) 0.064(3) Uani 1 1 d . . . 
H21A H -0.1200 0.0597 -0.0355 0.096 Uiso 1 1 calc R . . 
H21B H -0.0536 0.0428 0.0235 0.096 Uiso 1 1 calc R . . 
H21C H -0.0590 0.0734 -0.0668 0.096 Uiso 1 1 calc R . . 
F1 F 0.3628(4) 0.9034(6) 0.0787(5) 0.130(3) Uani 1 1 d . . . 
F2 F 0.3365(4) 0.9131(5) 0.1993(5) 0.125(3) Uani 1 1 d . . . 
F3 F 0.3406(5) 0.8118(4) 0.1407(8) 0.154(4) Uani 1 1 d . . . 
F4 F 0.2632(3) 0.8856(4) 0.0815(4) 0.0828(18) Uani 1 1 d . . . 
F5 F 0.2698(14) 0.2369(15) 0.9309(11) 0.142(8) Uani 0.50 1 d P . . 
F6 F 0.2951(16) 0.2017(19) 1.0410(15) 0.198(14) Uani 0.50 1 d P . . 
F7 F 0.2217(14) 0.2007(16) 1.027(2) 0.160(10) Uani 0.50 1 d P . . 
F8 F 0.2080(17) 0.2110(19) 0.953(2) 0.200(15) Uani 0.50 1 d P . . 
O1 O 0.5000 1.0000 0.5000 0.067(3) Uani 1 2 d S . . 
O2 O 0.0871(4) 0.2276(5) 0.8265(5) 0.095(3) Uani 1 1 d . . . 
O3 O 0.0428(5) 0.4213(4) 0.8487(8) 0.133(4) Uani 1 1 d . . . 
O4 O 0.4520(4) 0.9696(4) 0.3074(7) 0.125(4) Uani 1 1 d . . . 
O5 O 0.9752(8) 0.2289(6) 0.8260(6) 0.158(5) Uani 1 1 d . . . 
P1 P -0.07221(9) 0.15896(11) 0.02390(16) 0.0501(6) Uani 1 1 d . . . 
P2 P 0.24415(9) -0.02766(9) 0.34832(13) 0.0384(4) Uani 1 1 d . . . 
F9 F 1.000(3) 0.9674(16) 0.1754(19) 0.161(13) Uani 0.50 1 d P . . 
F10 F 1.013(3) 1.0538(8) 0.2716(14) 0.165(14) Uani 0.50 1 d P . . 
F11 F 0.9529(13) 0.9544(13) 0.271(3) 0.138(10) Uani 0.50 1 d P . . 
F12 F 0.953(2) 0.978(2) 0.191(4) 0.25(2) Uani 0.50 1 d P . . 
H9A H 0.2429 0.0624 0.1156 0.052 Uiso 1 1 d . . . 
H9B H 0.2331 -0.0084 0.1464 0.052 Uiso 1 1 d . . . 
H10 H 0.1499 0.0277 0.1924 0.052 Uiso 1 1 d . . . 
H12 H 0.0420 0.0842 0.1071 0.052 Uiso 1 1 d . . . 
H13A H 0.1173 0.1521 -0.0047 0.052 Uiso 1 1 d D . . 
H13B H 0.0405 0.1298 -0.0394 0.052 Uiso 1 1 d . . . 
  
loop_ 
 _atom_site_aniso_label 
 _atom_site_aniso_U_11 
 _atom_site_aniso_U_22 
 _atom_site_aniso_U_33 
 _atom_site_aniso_U_23 
 _atom_site_aniso_U_13 
 _atom_site_aniso_U_12 
Pd1 0.0285(3) 0.0339(3) 0.0396(3) 0.0045(2) 0.0064(2) -0.0003(2) 
Pd2 0.0281(3) 0.0259(3) 0.0609(4) 0.0041(2) 0.0086(2) 0.0001(2) 
B1 0.054(6) 0.067(7) 0.066(7) -0.008(5) 0.026(5) 0.012(5) 
B2 0.049(8) 0.046(7) 0.054(8) 0.000 0.020(7) 0.000 
B3 0.051(8) 0.057(9) 0.074(10) -0.019(8) 0.023(8) -0.010(7) 
C1 0.043(6) 0.083(8) 0.150(12) -0.028(8) 0.043(7) -0.026(5) 
C2 0.083(8) 0.056(6) 0.102(9) 0.016(6) -0.041(7) -0.028(6) 
C3 0.097(9) 0.095(9) 0.053(6) -0.012(6) 0.004(6) -0.055(8) 
C4 0.057(6) 0.042(5) 0.091(8) -0.024(5) 0.006(5) -0.011(4) 
C5 0.092(8) 0.057(6) 0.062(6) 0.013(5) -0.015(6) -0.039(6) 
C6 0.086(7) 0.056(5) 0.056(5) 0.008(4) 0.041(5) 0.013(5) 
C7 0.047(5) 0.059(6) 0.134(10) 0.039(7) -0.013(6) 0.005(5) 
C8 0.102(8) 0.032(4) 0.058(6) 0.001(4) 0.017(5) -0.002(5) 
C9 0.054(5) 0.048(4) 0.043(4) -0.007(4) 0.009(4) 0.007(4) 
C10 0.034(4) 0.034(4) 0.047(4) 0.001(3) -0.003(3) -0.004(3) 
C11 0.039(4) 0.034(4) 0.047(4) 0.001(3) 0.004(3) 0.001(3) 
C12 0.032(4) 0.027(3) 0.053(4) -0.001(3) 0.002(3) 0.003(3) 
C13 0.044(4) 0.036(4) 0.055(5) 0.000(3) 0.007(4) 0.010(3) 
C14 0.061(6) 0.035(5) 0.122(10) -0.018(6) -0.006(7) -0.009(4) 
C15 0.123(12) 0.053(7) 0.100(10) -0.027(6) 0.002(9) -0.002(7) 
C16 0.092(10) 0.034(5) 0.180(15) -0.012(7) 0.066(10) 0.005(5) 
C17 0.069(7) 0.026(4) 0.141(11) 0.009(6) -0.017(7) -0.001(4) 
C18 0.083(8) 0.042(5) 0.098(8) 0.004(5) 0.024(7) -0.023(5) 
C19 0.096(8) 0.062(6) 0.148(11) -0.035(7) 0.085(9) -0.027(6) 
C20 0.054(7) 0.106(11) 0.25(2) 0.097(12) -0.044(10) -0.020(7) 
C21 0.046(5) 0.073(6) 0.078(6) -0.024(5) 0.022(5) -0.024(4) 
F1 0.082(5) 0.213(10) 0.097(6) 0.021(6) 0.027(4) -0.045(6) 
F2 0.094(5) 0.195(9) 0.082(5) -0.045(5) 0.013(4) 0.027(6) 
F3 0.136(8) 0.072(5) 0.251(12) 0.031(7) 0.044(8) 0.028(5) 
F4 0.058(3) 0.097(5) 0.087(4) -0.019(4) 0.004(3) 0.006(3) 
F5 0.19(2) 0.163(19) 0.092(12) 0.010(13) 0.073(14) 0.081(17) 
F6 0.21(3) 0.27(3) 0.131(18) 0.05(2) 0.067(18) 0.14(3) 
F7 0.17(2) 0.15(2) 0.17(2) 0.04(2) 0.06(2) -0.067(19) 
F8 0.25(4) 0.19(3) 0.16(2) -0.11(2) 0.07(3) -0.09(3) 
O1 0.093(7) 0.007(3) 0.080(6) 0.012(3) -0.017(5) -0.008(3) 
O2 0.105(7) 0.103(6) 0.089(6) 0.025(5) 0.048(5) 0.000(5) 
O3 0.140(8) 0.055(5) 0.229(12) 0.053(6) 0.092(9) 0.071(5) 
O4 0.057(4) 0.054(4) 0.224(11) 0.065(6) -0.043(6) -0.024(4) 
O5 0.299(17) 0.134(9) 0.078(6) -0.035(6) 0.119(9) -0.028(10) 
P1 0.0284(10) 0.0359(10) 0.0827(16) 0.0168(10) 0.0074(10) -0.0009(8) 
P2 0.0352(10) 0.0324(9) 0.0484(11) 0.0062(8) 0.0121(8) 0.0076(7) 
F9 0.25(4) 0.17(3) 0.090(15) -0.038(16) 0.10(2) -0.06(3) 
F10 0.32(5) 0.070(8) 0.10(2) -0.017(9) 0.04(3) -0.05(2) 
F11 0.066(11) 0.152(17) 0.22(3) 0.08(2) 0.083(14) 0.012(12) 
F12 0.15(2) 0.22(4) 0.27(4) -0.08(4) -0.16(3) 0.05(3) 
  
_geom_special_details 
; 
 All esds (except the esd in the dihedral angle between two l.s. planes) 
 are estimated using the full covariance matrix.  The cell esds are taken 
 into account individually in the estimation of esds in distances, angles 
 and torsion angles; correlations between esds in cell parameters are only 
 used when they are defined by crystal symmetry.  An approximate (isotropic) 
 treatment of cell esds is used for estimating esds involving l.s. planes. 
; 
  
loop_ 
 _geom_bond_atom_site_label_1 
 _geom_bond_atom_site_label_2 
 _geom_bond_distance 
 _geom_bond_site_symmetry_2 
 _geom_bond_publ_flag 
Pd1 C9 2.163(8) . ? 
Pd1 C10 2.184(7) . ? 
Pd1 C2 2.230(10) . ? 
Pd1 C5 2.268(9) . ? 
Pd1 P2 2.271(2) . ? 
Pd1 C3 2.287(11) . ? 
Pd1 C1 2.306(9) . ? 
Pd1 C4 2.337(9) . ? 
Pd2 C12 2.187(7) . ? 
Pd2 C13 2.209(7) . ? 
Pd2 C16 2.234(10) . ? 
Pd2 P1 2.256(2) . ? 
Pd2 C17 2.268(9) . ? 
Pd2 C14 2.286(9) . ? 
Pd2 C15 2.326(11) . ? 
Pd2 C18 2.330(9) . ? 
B1 F3 1.322(14) . ? 
B1 F4 1.354(12) . ? 
B1 F1 1.362(13) . ? 
B1 F2 1.385(13) . ? 
B2 F12 1.24(2) 2_755 ? 
B2 F12 1.24(2) . ? 
B2 F9 1.28(2) . ? 
B2 F9 1.28(2) 2_755 ? 
B2 F11 1.330(17) 2_755 ? 
B2 F11 1.330(17) . ? 
B2 F10 1.35(2) 2_755 ? 
B2 F10 1.35(2) . ? 
B3 F7 1.282(18) 7_557 ? 
B3 F7 1.282(18) . ? 
B3 F8 1.29(2) . ? 
B3 F8 1.29(2) 7_557 ? 
B3 F5 1.330(15) . ? 
B3 F5 1.330(15) 7_557 ? 
B3 F6 1.41(2) . ? 
B3 F6 1.41(2) 7_557 ? 
C1 C2 1.388(18) . ? 
C1 C5 1.414(17) . ? 
C1 H1 0.9800 . ? 
C2 C3 1.363(19) . ? 
C2 H2 0.9800 . ? 
C3 C4 1.343(16) . ? 
C3 H3 0.9800 . ? 
C4 C5 1.390(16) . ? 
C4 H4 0.9800 . ? 
C5 H5 0.9800 . ? 
C6 P2 1.806(8) . ? 
C6 H6A 0.9600 . ? 
C6 H6B 0.9600 . ? 
C6 H6C 0.9600 . ? 
C7 P2 1.811(9) . ? 
C7 H7A 0.9600 . ? 
C7 H7B 0.9600 . ? 
C7 H7C 0.9600 . ? 
C8 P2 1.792(9) . ? 
C8 H8A 0.9600 . ? 
C8 H8B 0.9600 . ? 
C8 H8C 0.9600 . ? 
C9 C10 1.361(11) . ? 
C9 H9A 1.0335 . ? 
C9 H9B 0.9868 . ? 
C10 C11 1.505(10) . ? 
C10 H10 0.7158 . ? 
C11 C12 1.527(10) . ? 
C11 H11A 0.9700 . ? 
C11 H11B 0.9700 . ? 
C12 C13 1.428(10) . ? 
C12 H12 0.9898 . ? 
C13 H13A 1.0059 . ? 
C13 H13B 0.9790 . ? 
C14 C15 1.351(19) . ? 
C14 C18 1.369(16) . ? 
C14 H14 0.9800 . ? 
C15 C16 1.375(19) . ? 
C15 H15 0.9800 . ? 
C16 C17 1.404(19) . ? 
C16 H16 0.9800 . ? 
C17 C18 1.380(16) . ? 
C17 H17 0.9800 . ? 
C18 H18 0.9800 . ? 
C19 P1 1.819(11) . ? 
C19 H19A 0.9600 . ? 
C19 H19B 0.9600 . ? 
C19 H19C 0.9600 . ? 
C20 P1 1.797(12) . ? 
C20 H20A 0.9600 . ? 
C20 H20B 0.9600 . ? 
C20 H20C 0.9600 . ? 
C21 P1 1.788(9) . ? 
C21 H21A 0.9600 . ? 
C21 H21B 0.9600 . ? 
C21 H21C 0.9600 . ? 
F5 F7 1.38(3) 7_557 ? 
F5 F8 1.57(4) . ? 
F6 F7 1.57(4) . ? 
F6 F8 1.70(4) 7_557 ? 
F7 F8 1.19(3) . ? 
F7 F5 1.38(3) 7_557 ? 
F8 F6 1.70(4) 7_557 ? 
F9 F12 1.15(4) . ? 
F9 F11 1.20(3) 2_755 ? 
F10 F10 0.78(6) 2_755 ? 
F10 F12 1.70(5) 2_755 ? 
F11 F9 1.20(3) 2_755 ? 
F11 F12 1.38(6) . ? 
F12 F10 1.70(5) 2_755 ? 
  
loop_ 
 _geom_angle_atom_site_label_1 
 _geom_angle_atom_site_label_2 
 _geom_angle_atom_site_label_3 
 _geom_angle 
 _geom_angle_site_symmetry_1 
 _geom_angle_site_symmetry_3 
 _geom_angle_publ_flag 
C9 Pd1 C10 36.5(3) . . ? 
C9 Pd1 C2 144.4(5) . . ? 
C10 Pd1 C2 165.3(3) . . ? 
C9 Pd1 C5 100.0(4) . . ? 
C10 Pd1 C5 107.3(3) . . ? 
C2 Pd1 C5 59.0(4) . . ? 
C9 Pd1 P2 98.7(2) . . ? 
C10 Pd1 P2 93.6(2) . . ? 
C2 Pd1 P2 99.9(3) . . ? 
C5 Pd1 P2 158.9(3) . . ? 
C9 Pd1 C3 156.5(4) . . ? 
C10 Pd1 C3 135.2(5) . . ? 
C2 Pd1 C3 35.1(5) . . ? 
C5 Pd1 C3 58.5(4) . . ? 
P2 Pd1 C3 104.3(3) . . ? 
C9 Pd1 C1 110.3(4) . . ? 
C10 Pd1 C1 135.7(5) . . ? 
C2 Pd1 C1 35.6(5) . . ? 
C5 Pd1 C1 36.0(4) . . ? 
P2 Pd1 C1 126.5(4) . . ? 
C3 Pd1 C1 59.0(5) . . ? 
C9 Pd1 C4 122.9(4) . . ? 
C10 Pd1 C4 108.9(3) . . ? 
C2 Pd1 C4 57.2(4) . . ? 
C5 Pd1 C4 35.1(4) . . ? 
P2 Pd1 C4 134.6(3) . . ? 
C3 Pd1 C4 33.8(4) . . ? 
C1 Pd1 C4 58.3(4) . . ? 
C12 Pd2 C13 37.9(3) . . ? 
C12 Pd2 C16 146.2(5) . . ? 
C13 Pd2 C16 160.1(3) . . ? 
C12 Pd2 P1 94.54(19) . . ? 
C13 Pd2 P1 100.08(13) . . ? 
C16 Pd2 P1 98.7(4) . . ? 
C12 Pd2 C17 159.8(4) . . ? 
C13 Pd2 C17 130.3(4) . . ? 
C16 Pd2 C17 36.3(5) . . ? 
P1 Pd2 C17 104.9(3) . . ? 
C12 Pd2 C14 104.9(3) . . ? 
C13 Pd2 C14 103.3(3) . . ? 
C16 Pd2 C14 57.9(5) . . ? 
P1 Pd2 C14 156.5(3) . . ? 
C17 Pd2 C14 57.8(4) . . ? 
C12 Pd2 C15 114.0(4) . . ? 
C13 Pd2 C15 131.6(5) . . ? 
C16 Pd2 C15 35.0(5) . . ? 
P1 Pd2 C15 125.1(5) . . ? 
C17 Pd2 C15 58.6(5) . . ? 
C14 Pd2 C15 34.1(5) . . ? 
C12 Pd2 C18 124.9(4) . . ? 
C13 Pd2 C18 102.2(3) . . ? 
C16 Pd2 C18 58.9(5) . . ? 
P1 Pd2 C18 137.1(3) . . ? 
C17 Pd2 C18 34.9(4) . . ? 
C14 Pd2 C18 34.5(4) . . ? 
C15 Pd2 C18 57.6(5) . . ? 
F3 B1 F4 114.4(11) . . ? 
F3 B1 F1 107.4(10) . . ? 
F4 B1 F1 109.9(10) . . ? 
F3 B1 F2 108.7(11) . . ? 
F4 B1 F2 110.1(8) . . ? 
F1 B1 F2 105.9(10) . . ? 
F12 B2 F12 163(4) 2_755 . ? 
F12 B2 F9 119(3) 2_755 . ? 
F12 B2 F9 54(2) . . ? 
F12 B2 F9 54(2) 2_755 2_755 ? 
F12 B2 F9 119(3) . 2_755 ? 
F9 B2 F9 145(3) . 2_755 ? 
F12 B2 F11 65(3) 2_755 2_755 ? 
F12 B2 F11 106(2) . 2_755 ? 
F9 B2 F11 54.6(16) . 2_755 ? 
F9 B2 F11 106.8(16) 2_755 2_755 ? 
F12 B2 F11 106(2) 2_755 . ? 
F12 B2 F11 65(3) . . ? 
F9 B2 F11 106.8(16) . . ? 
F9 B2 F11 54.6(16) 2_755 . ? 
F11 B2 F11 123(2) 2_755 . ? 
F12 B2 F10 115(3) 2_755 2_755 ? 
F12 B2 F10 82(3) . 2_755 ? 
F9 B2 F10 95(2) . 2_755 ? 
F9 B2 F10 119(2) 2_755 2_755 ? 
F11 B2 F10 121(3) 2_755 2_755 ? 
F11 B2 F10 114(3) . 2_755 ? 
F12 B2 F10 82(3) 2_755 . ? 
F12 B2 F10 115(3) . . ? 
F9 B2 F10 119(2) . . ? 
F9 B2 F10 95(2) 2_755 . ? 
F11 B2 F10 114(3) 2_755 . ? 
F11 B2 F10 121(3) . . ? 
F10 B2 F10 34(3) 2_755 . ? 
F7 B3 F7 179.998(8) 7_557 . ? 
F7 B3 F8 124.7(15) 7_557 . ? 
F7 B3 F8 55.3(15) . . ? 
F7 B3 F8 55.3(15) 7_557 7_557 ? 
F7 B3 F8 124.7(15) . 7_557 ? 
F8 B3 F8 179.997(8) . 7_557 ? 
F7 B3 F5 63.7(16) 7_557 . ? 
F7 B3 F5 116.3(16) . . ? 
F8 B3 F5 73.7(16) . . ? 
F8 B3 F5 106.3(16) 7_557 . ? 
F7 B3 F5 116.3(16) 7_557 7_557 ? 
F7 B3 F5 63.7(16) . 7_557 ? 
F8 B3 F5 106.3(16) . 7_557 ? 
F8 B3 F5 73.7(16) 7_557 7_557 ? 
F5 B3 F5 179.999(14) . 7_557 ? 
F7 B3 F6 108.8(18) 7_557 . ? 
F7 B3 F6 71.2(18) . . ? 
F8 B3 F6 102(2) . . ? 
F8 B3 F6 78(2) 7_557 . ? 
F5 B3 F6 86.5(12) . . ? 
F5 B3 F6 93.5(12) 7_557 . ? 
F7 B3 F6 71.2(18) 7_557 7_557 ? 
F7 B3 F6 108.8(18) . 7_557 ? 
F8 B3 F6 78(2) . 7_557 ? 
F8 B3 F6 102(2) 7_557 7_557 ? 
F5 B3 F6 93.5(12) . 7_557 ? 
F5 B3 F6 86.5(12) 7_557 7_557 ? 
F6 B3 F6 179.994(14) . 7_557 ? 
C2 C1 C5 104.5(11) . . ? 
C2 C1 Pd1 69.2(6) . . ? 
C5 C1 Pd1 70.5(5) . . ? 
C2 C1 H1 127.7 . . ? 
C5 C1 H1 127.7 . . ? 
Pd1 C1 H1 127.7 . . ? 
C3 C2 C1 110.6(11) . . ? 
C3 C2 Pd1 74.7(6) . . ? 
C1 C2 Pd1 75.2(6) . . ? 
C3 C2 H2 124.4 . . ? 
C1 C2 H2 124.4 . . ? 
Pd1 C2 H2 124.4 . . ? 
C4 C3 C2 107.8(11) . . ? 
C4 C3 Pd1 75.2(6) . . ? 
C2 C3 Pd1 70.2(7) . . ? 
C4 C3 H3 125.9 . . ? 
C2 C3 H3 125.9 . . ? 
Pd1 C3 H3 125.9 . . ? 
C3 C4 C5 109.0(11) . . ? 
C3 C4 Pd1 71.1(6) . . ? 
C5 C4 Pd1 69.7(5) . . ? 
C3 C4 H4 125.5 . . ? 
C5 C4 H4 125.5 . . ? 
Pd1 C4 H4 125.5 . . ? 
C4 C5 C1 107.6(10) . . ? 
C4 C5 Pd1 75.2(6) . . ? 
C1 C5 Pd1 73.5(6) . . ? 
C4 C5 H5 125.7 . . ? 
C1 C5 H5 125.7 . . ? 
Pd1 C5 H5 125.7 . . ? 
P2 C6 H6A 109.5 . . ? 
P2 C6 H6B 109.5 . . ? 
H6A C6 H6B 109.5 . . ? 
P2 C6 H6C 109.5 . . ? 
H6A C6 H6C 109.5 . . ? 
H6B C6 H6C 109.5 . . ? 
P2 C7 H7A 109.5 . . ? 
P2 C7 H7B 109.5 . . ? 
H7A C7 H7B 109.5 . . ? 
P2 C7 H7C 109.5 . . ? 
H7A C7 H7C 109.5 . . ? 
H7B C7 H7C 109.5 . . ? 
P2 C8 H8A 109.5 . . ? 
P2 C8 H8B 109.5 . . ? 
H8A C8 H8B 109.5 . . ? 
P2 C8 H8C 109.5 . . ? 
H8A C8 H8C 109.5 . . ? 
H8B C8 H8C 109.5 . . ? 
C10 C9 Pd1 72.6(5) . . ? 
C10 C9 H9A 134.6 . . ? 
Pd1 C9 H9A 107.2 . . ? 
C10 C9 H9B 128.1 . . ? 
Pd1 C9 H9B 108.4 . . ? 
H9A C9 H9B 95.8 . . ? 
C9 C10 C11 123.8(7) . . ? 
C9 C10 Pd1 70.9(4) . . ? 
C11 C10 Pd1 110.1(5) . . ? 
C9 C10 H10 112.8 . . ? 
C11 C10 H10 117.4 . . ? 
Pd1 C10 H10 111.8 . . ? 
C10 C11 C12 108.6(6) . . ? 
C10 C11 H11A 110.0 . . ? 
C12 C11 H11A 110.0 . . ? 
C10 C11 H11B 110.0 . . ? 
C12 C11 H11B 110.0 . . ? 
H11A C11 H11B 108.3 . . ? 
C13 C12 C11 118.2(6) . . ? 
C13 C12 Pd2 71.9(4) . . ? 
C11 C12 Pd2 109.7(4) . . ? 
C13 C12 H12 128.5 . . ? 
C11 C12 H12 112.3 . . ? 
Pd2 C12 H12 100.1 . . ? 
C12 C13 Pd2 70.2(4) . . ? 
C12 C13 H13A 122.6 . . ? 
Pd2 C13 H13A 111.0 . . ? 
C12 C13 H13B 119.6 . . ? 
Pd2 C13 H13B 82.7 . . ? 
H13A C13 H13B 117.3 . . ? 
C15 C14 C18 111.2(12) . . ? 
C15 C14 Pd2 74.6(7) . . ? 
C18 C14 Pd2 74.5(6) . . ? 
C15 C14 H14 124.2 . . ? 
C18 C14 H14 124.2 . . ? 
Pd2 C14 H14 124.2 . . ? 
C14 C15 C16 106.7(13) . . ? 
C14 C15 Pd2 71.4(6) . . ? 
C16 C15 Pd2 68.8(7) . . ? 
C14 C15 H15 126.6 . . ? 
C16 C15 H15 126.6 . . ? 
Pd2 C15 H15 126.6 . . ? 
C15 C16 C17 108.0(12) . . ? 
C15 C16 Pd2 76.1(7) . . ? 
C17 C16 Pd2 73.1(6) . . ? 
C15 C16 H16 125.5 . . ? 
C17 C16 H16 125.5 . . ? 
Pd2 C16 H16 125.5 . . ? 
C18 C17 C16 107.5(11) . . ? 
C18 C17 Pd2 75.0(6) . . ? 
C16 C17 Pd2 70.5(6) . . ? 
C18 C17 H17 126.0 . . ? 
C16 C17 H17 126.0 . . ? 
Pd2 C17 H17 126.0 . . ? 
C14 C18 C17 106.3(11) . . ? 
C14 C18 Pd2 71.0(6) . . ? 
C17 C18 Pd2 70.1(5) . . ? 
C14 C18 H18 126.8 . . ? 
C17 C18 H18 126.8 . . ? 
Pd2 C18 H18 126.8 . . ? 
P1 C19 H19A 109.5 . . ? 
P1 C19 H19B 109.5 . . ? 
H19A C19 H19B 109.5 . . ? 
P1 C19 H19C 109.5 . . ? 
H19A C19 H19C 109.5 . . ? 
H19B C19 H19C 109.5 . . ? 
P1 C20 H20A 109.5 . . ? 
P1 C20 H20B 109.5 . . ? 
H20A C20 H20B 109.5 . . ? 
P1 C20 H20C 109.5 . . ? 
H20A C20 H20C 109.5 . . ? 
H20B C20 H20C 109.5 . . ? 
P1 C21 H21A 109.5 . . ? 
P1 C21 H21B 109.5 . . ? 
H21A C21 H21B 109.5 . . ? 
P1 C21 H21C 109.5 . . ? 
H21A C21 H21C 109.5 . . ? 
H21B C21 H21C 109.5 . . ? 
B3 F5 F7 56.4(11) . 7_557 ? 
B3 F5 F8 51.9(10) . . ? 
F7 F5 F8 100.8(18) 7_557 . ? 
B3 F6 F7 50.7(11) . . ? 
B3 F6 F8 47.8(14) . 7_557 ? 
F7 F6 F8 88.1(19) . 7_557 ? 
F8 F7 B3 62.6(16) . . ? 
F8 F7 F5 109(3) . 7_557 ? 
B3 F7 F5 59.8(13) . 7_557 ? 
F8 F7 F6 98(3) . . ? 
B3 F7 F6 58.1(14) . . ? 
F5 F7 F6 84.9(19) 7_557 . ? 
F7 F8 B3 62.1(15) . . ? 
F7 F8 F5 106(3) . . ? 
B3 F8 F5 54.4(14) . . ? 
F7 F8 F6 97(2) . 7_557 ? 
B3 F8 F6 54.0(14) . 7_557 ? 
F5 F8 F6 75.0(17) . 7_557 ? 
C21 P1 C20 107.2(7) . . ? 
C21 P1 C19 103.7(5) . . ? 
C20 P1 C19 104.1(8) . . ? 
C21 P1 Pd2 116.8(3) . . ? 
C20 P1 Pd2 113.0(4) . . ? 
C19 P1 Pd2 111.0(4) . . ? 
C8 P2 C6 103.6(5) . . ? 
C8 P2 C7 106.0(5) . . ? 
C6 P2 C7 103.5(6) . . ? 
C8 P2 Pd1 116.6(3) . . ? 
C6 P2 Pd1 113.2(3) . . ? 
C7 P2 Pd1 112.7(3) . . ? 
F12 F9 F11 122(3) . 2_755 ? 
F12 F9 B2 61.0(17) . . ? 
F11 F9 B2 64.9(15) 2_755 . ? 
F10 F10 B2 73.1(13) 2_755 . ? 
F10 F10 F12 118(2) 2_755 2_755 ? 
B2 F10 F12 46.0(13) . 2_755 ? 
F9 F11 B2 60.5(13) 2_755 . ? 
F9 F11 F12 115(2) 2_755 . ? 
B2 F11 F12 54.3(16) . . ? 
F9 F12 B2 64.7(16) . . ? 
F9 F12 F11 112(3) . . ? 
B2 F12 F11 60.8(17) . . ? 
F9 F12 F10 83(4) . 2_755 ? 
B2 F12 F10 51.8(19) . 2_755 ? 
F11 F12 F10 93(2) . 2_755 ? 
  
_diffrn_measured_fraction_theta_max    0.997 
_diffrn_reflns_theta_full              26.37 
_diffrn_measured_fraction_theta_full   0.997 
_refine_diff_density_max    2.210 
_refine_diff_density_min   -1.158 
_refine_diff_density_rms    0.173 
